# Supplementary material for: Rotating-disk electrode analysis of the oxidation behavior of dissolved Li2O2 in Li–O2 batteries
Source: Royal Society of Chemistry journal article supplement (doi:10.1039/c8ra03416h), 2018-01-01
Supplement: c8ra03416h1.pdf [file c8ra03416h1.pdf]

## *Supporting Information*

### Rotating-disk electrode analysis of the oxidation behavior of dissolved Li<sub>2</sub>O<sub>2</sub> in Li-O<sub>2</sub> batteries

Jing Ren,<sup>a</sup> Zhimei Huang,<sup>a</sup> Pramod K. Kalambate,<sup>a</sup> Yue Shen<sup>\*a</sup> and Yunhui Huang<sup>\*a</sup>

a. State Key Laboratory of Material Processing and Die & Mould Technology, School of Materials Science and Engineering, Huazhong University of Science and Technology (HUST), Wuhan 430074, Hubei, P. R. China.

E-mail: [shenyue1213@hust.edu.cn](mailto:shenyue1213@hust.edu.cn) (Yue Shen), [huangyh@hust.edu.cn](mailto:huangyh@hust.edu.cn) (Yunhui Huang)

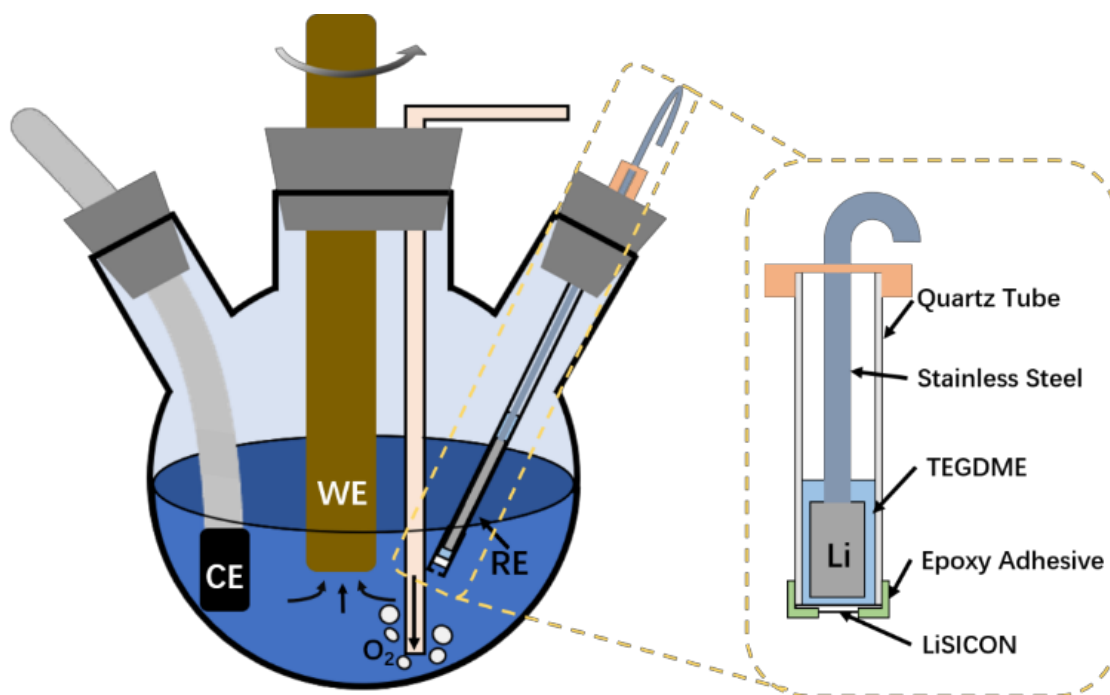

**Figure S1** Schematic illustration of three-electrode system and detail of the reference electrode.

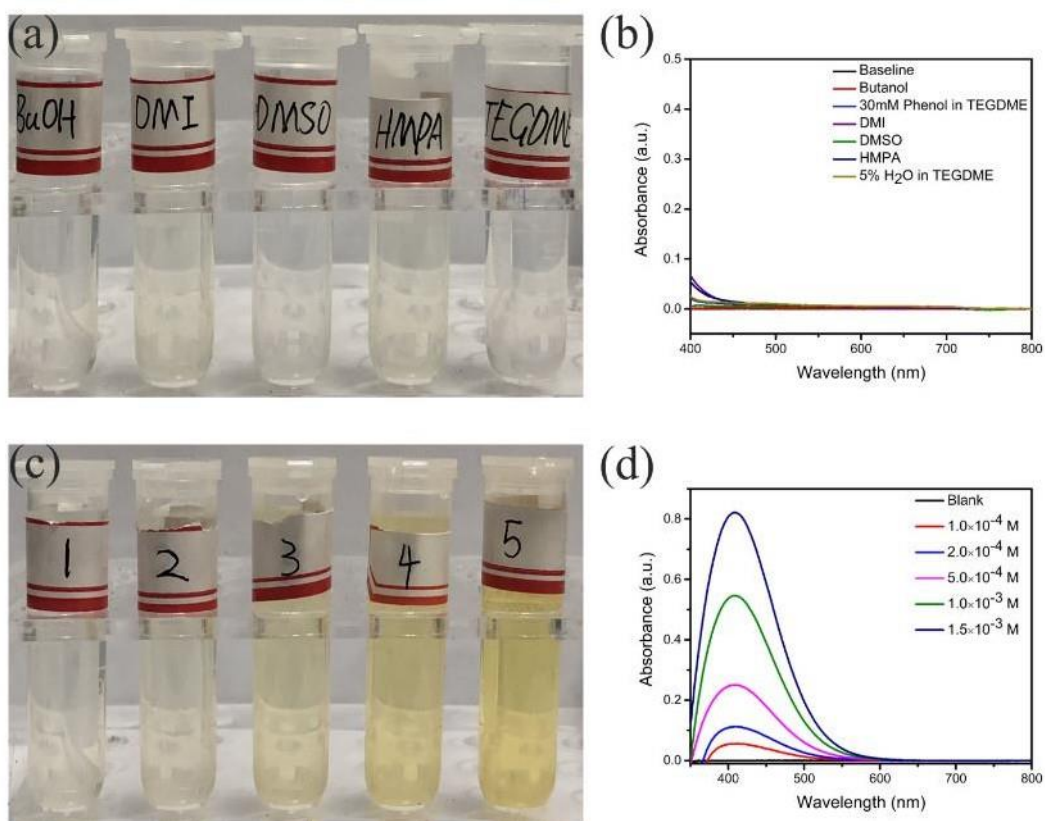

**Figure S2** Digital photo (a,c) and UV-Vis absorption spectrum (b,d) of pure electrolytes mixed with  $\text{TiOSO}_4/\text{H}_2\text{SO}_4$  solution (a,b) and five standard samples (c,d).

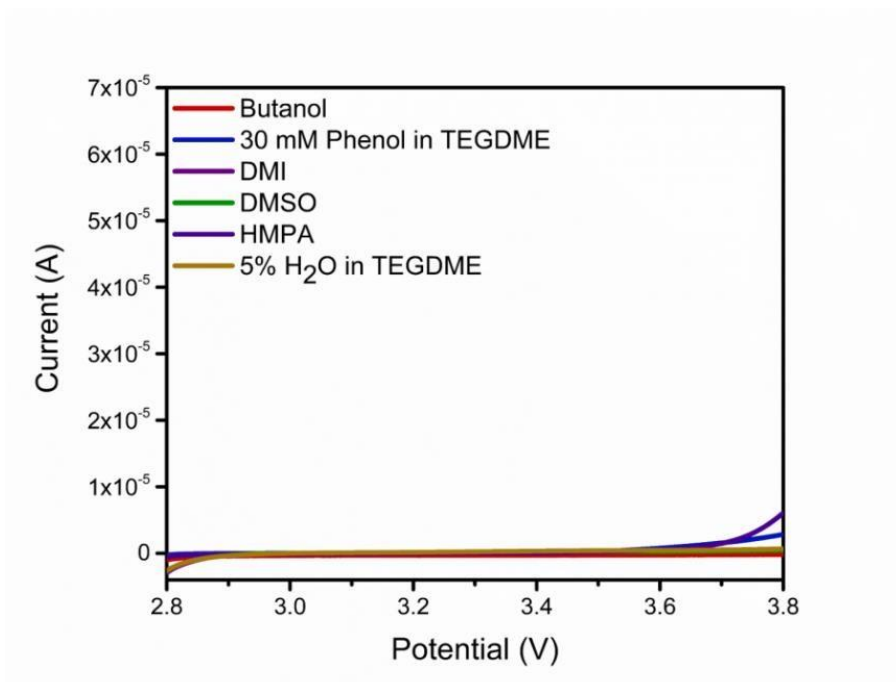

Figure S3 LSV curves of pure electrolytes at the potential range of 2.8 - 3.8V.

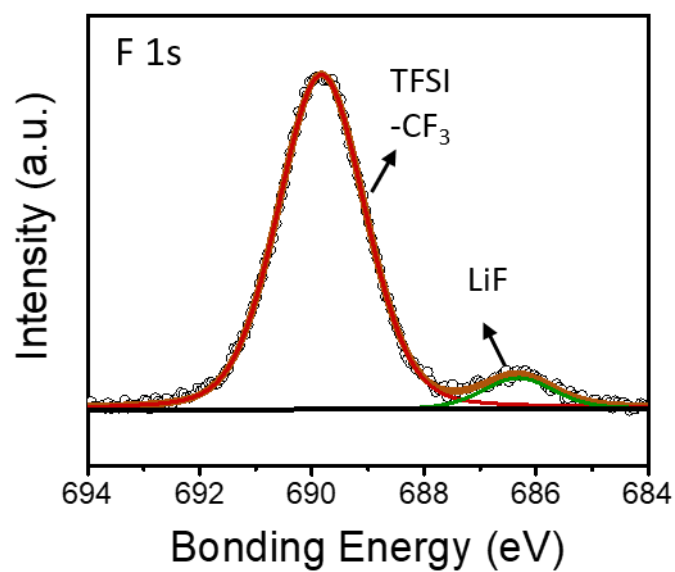

Figure S4 F 1s XPS spectra of the electrode surface in butanol.
